# Supplementary material
Source: PubMed Central journal article supplement (PMC3672901)
Supplement: mmc1.pdf [file mmc1.pdf]

# **Modeling Stochastic Kinetics of Molecular Machines at Multiple Levels: From Molecules to Modules**

Debashish Chowdhury\*

Department of Physics, Indian Institute of Technology, Kanpur, India

Chowdhury

Stochastic Kinetics of Molecular Machines

Submitted August 23, 2012, and accepted for publication April 17, 2013.

\*Correspondence: [debch@iitk.ac.in](mailto:debch@iitk.ac.in)

## Supplementary information

### A. Motor kinetics as wandering in a landscape

#### • Motor kinetics as wandering in a mechano-chemical landscape

Suppose the continuous variables  $X_1 \equiv X$  and  $X_2 \equiv \xi$  denote the mechanical and chemical states of the motor, respectively. The equation governing the time evolution of the probability density  $\mathcal{P}(X_1, X_2, t)$  is

$$\frac{\partial \mathcal{P}(X_1, X_2, t)}{\partial t} = \sum_{i=1}^2 \left[ \frac{k_T}{\gamma_i} \frac{\partial^2 \mathcal{P}}{\partial X_i^2} - \frac{1}{\gamma_i} \frac{\partial}{\partial X_i} \left\{ \left( -\frac{\partial U}{\partial X_i} + F_i \right) \mathcal{P} \right\} \right] \quad (1)$$

where  $U(X_1, X_2)$  is the potential of mean force and  $\gamma_i$  ( $i = 1, 2$ ) are the measures of dissipation. The two terms on the right hand side of eq.(1) account for the diffusion and drift of the motor in this landscape.

#### • Motor kinetics as wandering in the time-dependent mechanical landscape

Let  $X$  and  $\sigma$  denote the mechanical and chemical states of the motor, respectively, where the latter, unlike  $\xi$ , is a discrete variable. An arbitrary value of  $X$  is denoted by  $x$  while an arbitrary value of  $\sigma$  is denoted by  $\mu$ .  $W_{\mu \rightarrow \nu}(x)$  is the transition probability per unit time for the transition from  $\mu$  to  $\nu$  while the mechanical variable  $x$  remains frozen at the current instantaneous value  $x$ . The time evolution of the state of the motor is described by

$$\begin{aligned} \frac{\partial \mathcal{P}(x, \mu, t)}{\partial t} &= \left[ \frac{k_B T}{\gamma} \frac{\partial^2 \mathcal{P}}{\partial x^2} - \frac{1}{\gamma} \frac{\partial}{\partial x} \left\{ \left( -\frac{\partial U}{\partial x} + F \right) \mathcal{P} \right\} \right] \\ &+ \sum_{\nu} \mathcal{P}(x, \nu) W_{\nu \rightarrow \mu}(x) - \sum_{\lambda} \mathcal{P}(x, \mu) W_{\mu \rightarrow \lambda}(x) \end{aligned} \quad (2)$$

which is a hybrid of Fokker-Planck and master equations. Note that there is no term in this equation which would correspond to a mixed mechano-chemical transition.

### B. Motor kinetics as a jump process in a fully discrete mechano-chemical network

Let  $P_{\mu}(i, t)$  be the probability of finding the motor at the discrete position labelled by  $i$  and in the discrete chemical state  $\mu$  at time  $t$ . The symbol  $k_{\mu}(i \rightarrow j)$  denotes a purely mechanical transition  $i \rightarrow j$  while the chemical state  $\mu$  remains unaltered. Similarly,  $W_{\mu \rightarrow \nu}(i)$  denotes a purely chemical transition  $\mu \rightarrow \nu$  while the mechanical state  $i$  remains frozen. Mixed mechano-chemical transitions that involve both the transitions  $i \rightarrow j$  and  $\mu \rightarrow \nu$  are denoted by the symbol  $\omega_{\mu \rightarrow \nu}(i \rightarrow j)$ .

Then, the master equation for  $P_{\mu}(i, t)$  is given by

$$\begin{aligned} \frac{\partial P(i, \mu, t)}{\partial t} &= \left[ \sum_{j \neq i} P(j, \mu, t) k_{\mu}(j \rightarrow i) - \sum_{j \neq i} P(i, \mu, t) k_{\mu}(i \rightarrow j) \right] \\ &+ \left[ \sum_{\nu} P(i, \nu, t) W_{\nu \rightarrow \mu}(i) - \sum_{\lambda} P(i, \mu, t) W_{\mu \rightarrow \lambda}(i) \right] \end{aligned}$$

$$+ \left[ \sum_{j \neq i} \sum_{\nu} P(j, \nu, t) \omega_{\nu \rightarrow \mu}(j \rightarrow i) - \sum_{j \neq i} \sum_{\lambda} P(i, \mu, t) \omega_{\mu \rightarrow \lambda}(i \rightarrow j) \right] \quad (3)$$

where the terms enclosed by the three different brackets [.] correspond to the purely mechanical, purely chemical and mechano-chemical transitions, respectively.

### C. Statistical inference from data: frequentist and Bayesian approaches

For simplicity, let us consider a motor that has only two possible distinct interconvertible states denoted by  $\mathcal{E}_1$  and  $\mathcal{E}_2$ .

$$\mathcal{E}_1 \xrightleftharpoons[k_r]{k_f} \mathcal{E}_2 \quad (4)$$

We begin our discussion assuming that the actual sequence of the states, generated by the Markovian kinetics of the motor, is available over the time interval  $0 \leq t \leq T$ . Our aim is to extract the magnitudes of the rate constants  $k_f$  and  $k_r$ .

Suppose  $t_j^{(1)}$  and  $t_j^{(2)}$  denote the time interval of the  $j$ -th residence of the device in states  $\mathcal{E}_1$  and  $\mathcal{E}_2$ , respectively. Moreover, suppose that the device makes  $N_1$  and  $N_2$  visits to the states  $\mathcal{E}_1$  and  $\mathcal{E}_2$ , respectively, and  $N = N_1 + N_2$  is the total number of states in the sequence. Therefore, total time of dwell in the two states are  $T_1 = \sum_{j=1}^{N_1} t_j^{(1)}$  and  $T_2 = \sum_{j=1}^{N_2} t_j^{(2)}$  where  $T_1 + T_2 = T$ .

Since the times of dwell in each state are exponentially distributed, the likelihood of any state trajectory  $S$  is the conditional probability density

$$P(S|k_f, k_r) = \left( \prod_{j=1}^{N_1} k_f e^{-k_f t_j^{(1)}} \right) \left( \prod_{j=1}^{N_2} k_r e^{-k_r t_j^{(2)}} \right) = \left( k_f^{N_1} e^{-k_f T_1} \right) \left( k_r^{N_2} e^{-k_r T_2} \right) \quad (5)$$

for given  $k_f$  and  $k_r$ . Using (5) in  $d[\ln P(S|k_f, k_r)]/dk_f = 0 = d[\ln P(S|k_f, k_r)]/dk_r$  we get the maximum-likelihood (ML) estimates  $k_f = N_1/T_1$  and  $k_r = N_2/T_2$  for the two rate constants.

The Bayesian approach is based on the Bayes theorem which, in this case, states that

$$P(k_f, k_r | \underline{S}) = \frac{P(S|k_f, k_r)P(k_f, k_r)}{P(S)} = \frac{P(S|k_f, k_r)P(k_f, k_r)}{\sum_{k'_f, k'_r} P(S|k'_f, k'_r)P(k'_f, k'_r)} \quad (6)$$

where  $P(k_f, k_r)$  is the prior. Assuming a uniform prior, i.e., a constant for positive  $k_f$  and  $k_r$ , but zero otherwise, we get the poster distribution

$$P(k_f, k_r | \underline{S}) = \left[ \frac{T_1^{N_1+1}}{\Gamma(N_1+1)} k_f^{N_1} e^{-k_f T_1} \right] \left[ \frac{T_2^{N_2+1}}{\Gamma(N_2+1)} k_r^{N_2} e^{-k_r T_2} \right] \quad (7)$$

of the rate constants. Note that the mean of  $k_f$  and  $k_r$ , obtained from the posterior distribution (7) are  $(N_1 + 1)/T_1$  and  $(N_2 + 1)/T_2$ , respectively. The corresponding most probable values, obtained from ML analysis, are  $N_1/T_1$  and  $N_2/T_2$ , respectively; the minor differences between the two alternative estimates is insignificant if  $N_1$  and  $N_2$  are sufficiently large.
